# Supplementary material for: VEGFR2-targeted ultrasound molecular imaging of angiogenesis to evaluate liver allograft fibrosis
Source: Royal Society of Chemistry journal article supplement (doi:10.1039/d1bm00100k), 2021-01-01

## **VEGFR2-targeted Ultrasound Molecular Imaging of Angiogenesis to Evaluate Liver Allograft Fibrosis**

Chen Qiu<sup>12</sup>, Tingting Sha<sup>12</sup>, Tinghui Yin<sup>12</sup>, Wei Zhang<sup>12</sup>, Xiuling Chen<sup>12</sup>, Xiaoyan Miao<sup>12</sup>,  
Rongqin Zheng<sup>12</sup>, Xintao Shuai<sup>3\*</sup>, Jie Ren<sup>12\*\*</sup>

1. Department of Medical Ultrasound, Laboratory of Novel Optoacoustic (Ultrasonic) imaging, The Third Affiliated Hospital of Sun Yat-sen University, Guangzhou, China
2. Guangdong Key Laboratory of Liver Disease Research, The Third Affiliated Hospital of Sun Yat-sen University, Guangzhou, China
3. PCFM Lab of Ministry of Education, School of Chemistry and Chemical Engineering, Sun Yat-sen University, Guangzhou, China

### **Correspondence author:**

\*Correspondence to Xintao Shuai, PCFM Lab of Ministry of Education, School of Chemistry and Chemical Engineering, Sun Yat-Sen University, Guangzhou 510275, China. Email: shuaixt@mail.sysu.edu.cn (X. Shuai).

\*\* Correspondence to Jie Ren, Department of Medical Ultrasound, Laboratory of Novel Optoacoustic (Ultrasonic) imaging, the Third Affiliated Hospital of Sun Yat-sen University, Guangzhou 510630, China. Email: renj@mail.sysu.edu.cn.

#These authors contributed equally to this work.

### **Supplemental Materials and Methods**

#### ***In vitro* specific attachment of MB<sub>VEGFR2</sub> to HUVEC**

Human Umbilical Vein Endothelial cells (HUVEC) with a relatively high expression of VEGFR2 were used to confirm specific targeting ability of MB<sub>VEGFR2</sub> *in vitro*. HUVECs were routinely cultured in Endothelial Cell Medium (ECM) containing 10% fetal bovine serum (FBS) at 37 °C in a

humidified atmosphere. After the cells reached the confluence of 70%, HUVECs were seeded in 6-well plates at a density of  $1 \times 10^5$  cells per well and incubated overnight in complete growth medium. Meanwhile, to locate MB<sub>VEGFR2</sub>, DiI marked MB<sub>VEGFR2</sub> or MB<sub>CON</sub> were prepared. 0.5 ml of medium containing either MB<sub>VEGFR2</sub> or MB<sub>CON</sub> were incubated to the cells for 30 minutes. After washing with PBS for 3 times, all cells were stained in a solution of 2  $\mu$ g/mL DAPI for 30 minutes to mark the nucleus. Afterwards, the cells were observed under a fluorescent microscope (Nikon, Japan) at magnitude of 400 $\times$ . 3 samples of each group were observed in this experiment.

### ***In vivo localization of MB<sub>VEGFR2</sub> with in liver***

To determine the location of MBs to the target (VEGFR2) *in vivo*, we used confocal laser scanning microscopy (CLSM) to observe tissue slides. Rat LAF models (7 d after IRI surgery) were established. A total of  $2.0 \times 10^7$  bubbles/mL of DiI-labeled MB<sub>VEGFR2</sub> or MB<sub>CON</sub> were injected into the tail vein of each rat (n = 3 of each group). To clear the labeled bubbles from circulation, the heart was perfused with 200ml 0.9% normal saline 1 h after bubble injection. Liver tissues were immediately extracted for sectioning into 5- $\mu$ m slices. Frozen sections underwent immunofluorescent staining for VEGFR2. Briefly, after incubation with 0.5% Triton for 10 minutes, the sections are treated with 10% normal goat serum for 1 h at room temperature for antigen blocking. VEGFR2 (Abcam, Cambridge, MA) antibodies were then added to the sections for 1 h at 37 °C. Finally, after being washed with PBS, all sections were incubated with with FITC-conjugated anti-rat secondary antibodies (eBioscience, San Diego, CA) at room temperature for 30 min. The frozen

slides were observed using an CLSM (Zeiss, Germany) at a 630× magnification.

### ***The Destruction–Replenishment Approach***

Targeted US imaging was obtained via a destruction–replenishment approach (Figure S1): Firstly, 60 s of continuous imaging of sufficient affiliated and freely circulating MBs was obtained. Afterwards, all MBs in the region were destroyed by high mechanical index for 1 s using a “flash” function. Subsequent post-destruction images were recorded for 10 s to capture freely circulating MBs.

### ***Supplementary Figures***

**Fig S1**

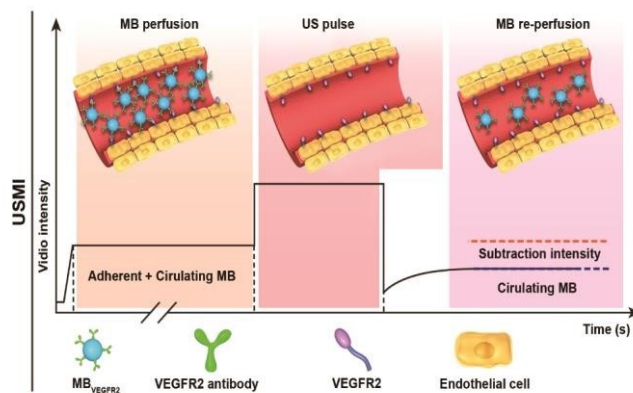

Fig S2

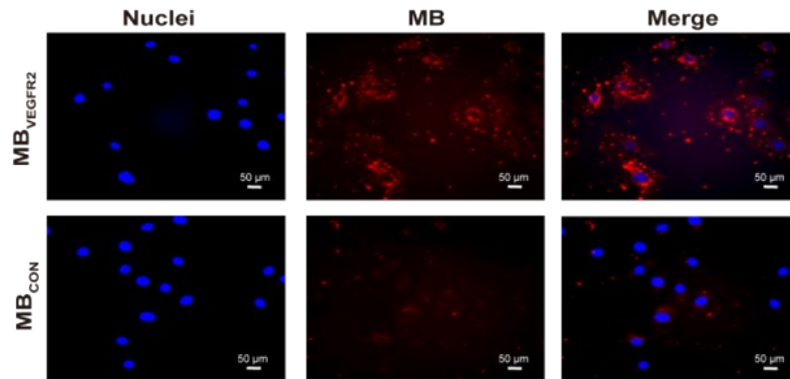

Fig S3

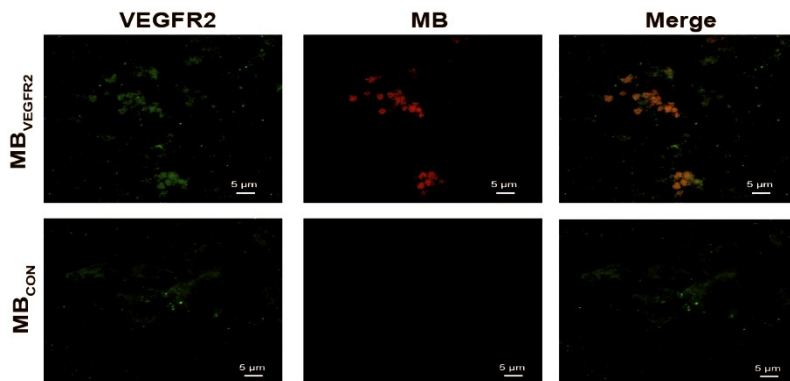

Fig S4

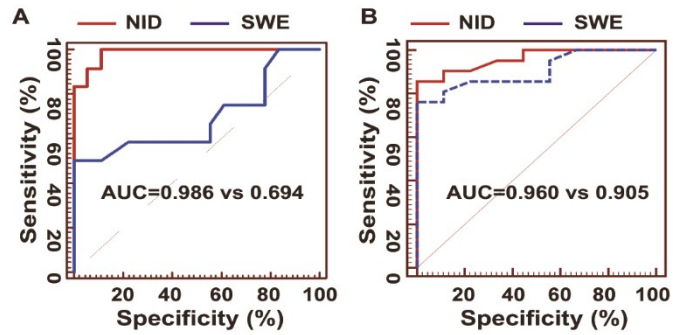

Fig S5

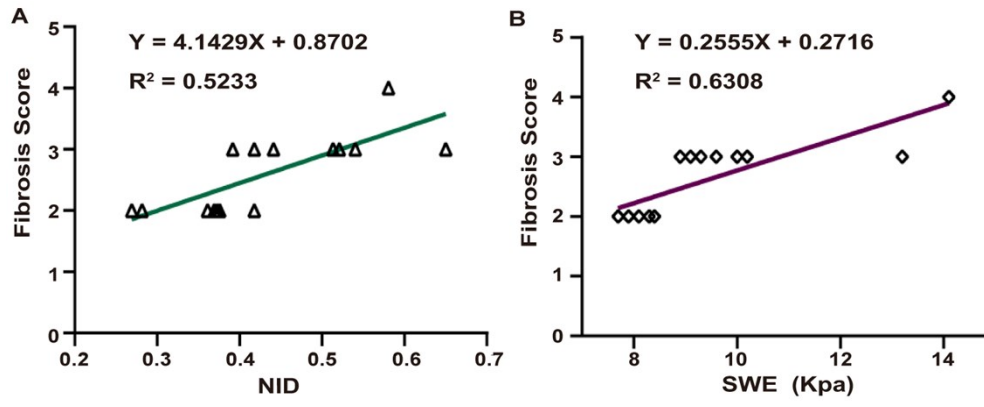

Supplement: d1bm00100k3.pdf [file d1bm00100k3.pdf]
