# Supplementary material for: VEGFR2-targeted ultrasound molecular imaging of angiogenesis to evaluate liver allograft fibrosis
Source: Royal Society of Chemistry journal article supplement (doi:10.1039/d1bm00100k), 2021-01-01
Supplement: d1bm00100k1.pdf [file d1bm00100k1.pdf]

Fig S1. Schematic illustration of destruction–replenishment approach for quantitative VEGFR2-targeted USMI.

Fig S2. *In vitro* specific targeting ability of MB<sub>VEGFR2</sub>. HUVECs were stained with DAPI as blue fluorescent and MBs were labeled by DiI as red fluorescent.

Fig S3. *In vivo* colocalization of MB<sub>VEGFR2</sub> to the target in liver. The targets (VEGFR2) were labeled by FITC and MBs were labeled by DiI. n = 3 of each group.

Fig S4. Graphs show receiver operating characteristic (ROC) curves of SWE and USMI diagnosing liver fibrosis of  $F \leq 1$  (A) and  $F \leq 2$  (B).

Fig S5. Statistical analyses of NID and SWE for 5 d, 7 d and 10 d groups. (A) Linear correlation analysis between NID and Metavir fibrosis score for groups including 5 d, 7 d and 10 d group. (B) Linear correlation analysis between SWE and Metavir fibrosis score for groups including 5 d, 7 d and 10 d group. n = 5 of each group.
