# Supplementary figures and images for: VEGFR2-targeted ultrasound molecular imaging of angiogenesis to evaluate liver allograft fibrosis
Source: Royal Society of Chemistry journal article supplement (doi:10.1039/d1bm00100k), 2021-01-01

Fig S1

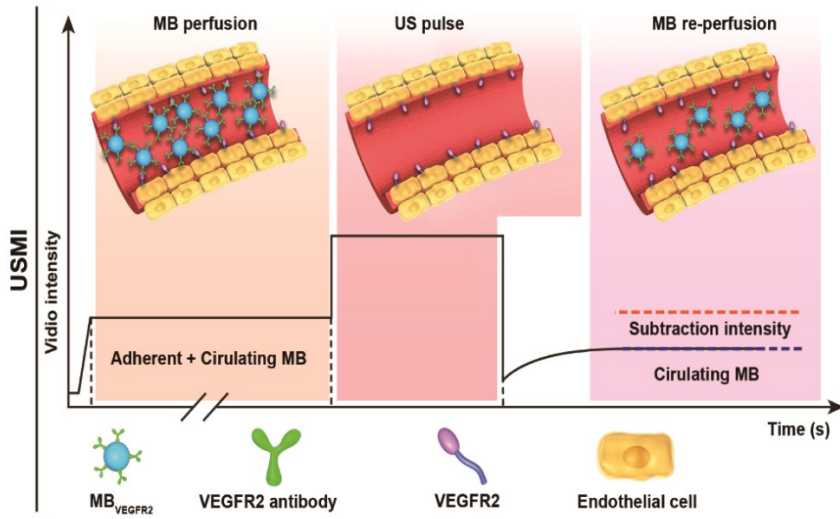

Fig S2

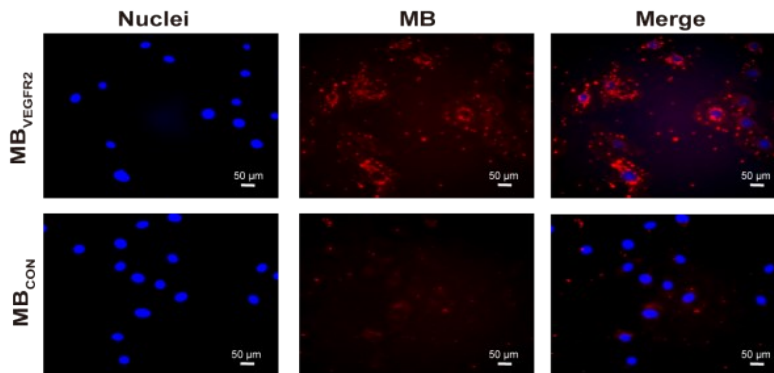

Fig S3

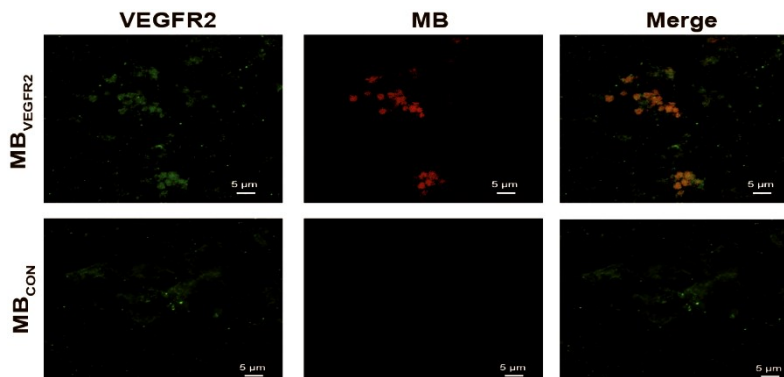

Fig S4

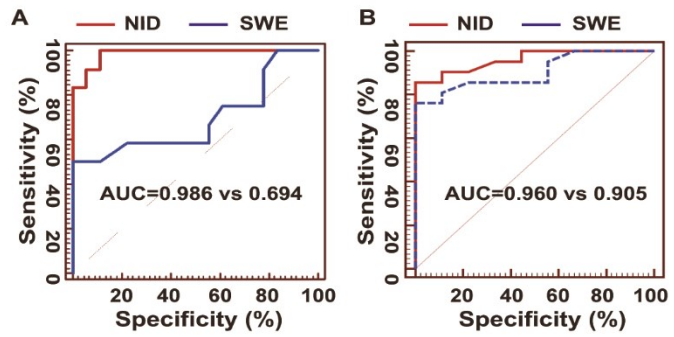

Fig S5

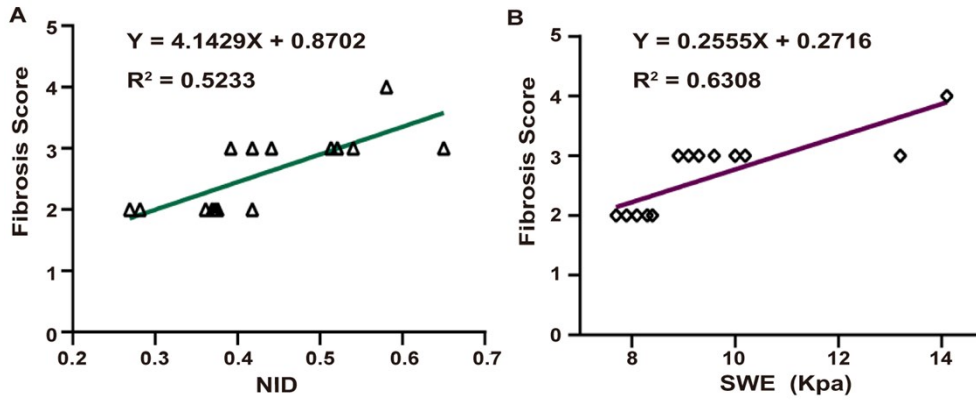

Supplement: d1bm00100k2.pdf [file d1bm00100k2.pdf]
